# Supplementary material for: Confused ionic liquid ions—a “liquification” and dosage strategy for pharmaceutically active salts
Source: Royal Society of Chemistry journal article supplement (doi:10.1039/b925147b), 2010-01-01

## Supporting Information

### Confused Ionic Liquid Ions – A “Liquification” and Dosage Strategy for Pharmaceutically Active Salts

#### Contents

|                                                                                                       |   |
|-------------------------------------------------------------------------------------------------------|---|
| 1. General .....                                                                                      | 2 |
| 2. Experimental .....                                                                                 | 3 |
| 3. Table S1: Physical properties of tetrabutylphosphonium salicylate-salicylic acid salts. ....       | 4 |
| 4. Figure S1: Liquifaction of solid PBu <sub>4</sub> Sal [ <b>1</b> ] with excess salicylic acid..... | 5 |
| 5. Figure S2: TGA traces of tetrabutylphosphonium salicylate-salicylic acid salts.....                | 6 |

## 1. General

All chemicals unless otherwise stated were purchased from Aldrich Chemical Company (Dorset, UK) and used without further purification. NMR data were recorded in  $d_6$ -DMSO at 25 °C on a Bruker (Coventry, UK) 300 DRX spectrometer and the solvent peak was used as reference. Dichlorofluoromethane- $d$  for Vt-NMR experiments was prepared according to the literature.<sup>1</sup> Samples were prepared as 0.05 N solutions under nitrogen and measured with 64 scans.

Infrared spectra were recorded as neat samples from 4000-650  $\text{cm}^{-1}$  on a Perkin-Elmer (Dublin, Ireland) Spectrum 100 FT-IR spectrometer fitted with a Universal ATR Sampling Accessory. Electrospray mass spectrometry was performed on a LCT Premier from Waters using an Advion nanomate injection system (Manchester, UK),

Water content was measured by Karl-Fischer-titration with a Mettler Toledo Titrator (Hiranuma Sangyo, Japan). The water content of all samples was found to be below 150 ppm.

Thermogravimetical analysis was performed on a Mettler Toledo Star<sup>e</sup> TGA/DSC unit (Leicester, UK) under nitrogen. Samples between 5 and 10 mg were placed in open alumina pans and were heated from 25 °C to 600 °C with a heating rate of 5 °C/min. Decomposition temperatures ( $T_{5\% \text{dec}}$ ) were reported from onset to 5 wt% mass loss.

Differential scanning calorimetry (DSC) was performed on a Mettler Toledo Star<sup>e</sup> DSC unit (Leicester, UK) under nitrogen. Samples between 5 and 10 mg were heated from 25 °C to 110 °C at a heating rate of 5 °C/min followed by a 5 min isotherm. A cooling rate of 5 °C/min to -70 °C was followed by a 5 min isotherm at -70 °C, and the cycle was repeated twice. Second and third cycles proved to be identical and only the third heating run was used for data collection.

---

<sup>1</sup> J. S. Siegel and A. L. A. Annet, *J. Org. Chem.* 1977, **53**, 2629.

## 2. Experimental

**Tetrabutylphosphonium salicylate 1.** A solution of tetrabutylphosphonium hydroxide (40% in H<sub>2</sub>O) (3.414 g, 5 mmol) was added dropwise to a solution of salicylic acid (0.691 g, 5 mmol) in 20 mL of acetone and stirred for 15 min at room temperature. The solvent was evaporated and the remaining viscous liquid was dried at 0.1 mbar with stirring for 24 h to obtain tetrabutylphosphonium salicylate **1** in quantitative yield as colorless crystals. IR (neat)  $\nu$  = 2959, 2932, 2875, 1643, 1584, 1456, 1365, 1287, 856, 809, 756, 703, 668 cm<sup>-1</sup>; <sup>1</sup>H-NMR (300 MHz, d<sub>6</sub>-DMSO)  $\delta$ (ppm) = 7.74 (dd,  $J_1$  = 7.73 Hz,  $J_2$  = 1.87 Hz, 1H), 7.32 (t,  $J_1$  = 7.59 Hz, 1H), 6.77 (m, 2H), 2.20 (m, 8 H), 1.41 (m, 16 H), 0.9 (t,  $J$  = 7.06 Hz, 12 H). <sup>31</sup>P-NMR (121.5 MHz, d<sub>6</sub>-DMSO)  $\delta$ (ppm) = 35.1. <sup>13</sup>C-NMR (75 MHz, d<sub>6</sub>-DMSO)  $\delta$ (ppm) = 171.9, 163.1, 131.1, 129.8, 120.6, 115.7, 115.6, 23.31 (d,  $J$  = 16.36 Hz), 22.62 (d, 4.84 Hz), 17.30 (47.27 Hz), 13.19. HRMS (ES+) [ $m/z$ ] = 259.2550; (ES-) [ $m/z$ ] = 137.0225. mp 57.32 °C; T<sub>5%onset</sub> 307.94 °C.

**Synthesis of Tetrabutylphosphonium salicylate-salicylic acid dimer.** A screw-cap vial was charged with solid tetrabutylphosphonium salicylate **1** and salicylic acid under nitrogen, sealed, and carefully heated with shaking until a clear homogenous liquid was obtained. IR (neat)  $\nu$  = 2964, 2937, 2874, 1654, 1598, 1485, 1459, 1253, 756, 702, 654 cm<sup>-1</sup>; <sup>1</sup>H-NMR (300 MHz, d<sub>6</sub>-DMSO)  $\delta$ (ppm) = 7.75 (dd,  $J_1$  = 7.72 Hz,  $J_2$  = 1.90 Hz, 2H), 7.32 (m, 2H), 6.78 (m, 4H), 2.16 (m, 8 H), 1.40 (m, 16 H), 0.9 (t,  $J$  = 7.10 Hz, 12 H). <sup>31</sup>P-NMR (121.5 MHz, d<sub>6</sub>-DMSO)  $\delta$ (ppm) = 35.3. <sup>13</sup>C-NMR (75 MHz, d<sub>6</sub>-DMSO)  $\delta$ (ppm) = 172.0, 162.2, 133.8, 130.5, 117.9, 117.6, 116.8, 23.3 (d,  $J$  = 15.81 Hz), 22.63 (d, 4.22 Hz), 17.30 (47.80 Hz), 13.24. HRMS (ES+) [ $m/z$ ] = 259.2549; (ES-) [ $m/z$ ] = 137.0218. T<sub>g</sub> -45.6 °C; T<sub>5%onset</sub> 230.2 °C.

**Lidocainium salicylate 2.** Lidocainium chloride monohydrate (2.881 g, 10 mmol) and sodium salicylate (1.601 g, 10 mmol) were dissolved in 50 mL of acetone/H<sub>2</sub>O 1:1 and stirred overnight at room temperature. The remaining suspension was diluted with 50 mL of H<sub>2</sub>O and extracted with dichloromethane. The combined organic layers were washed successively with water until no more chloride ions could be detected in the washings (checked by addition of AgNO<sub>3</sub> solution), dried over MgSO<sub>4</sub> and the solvent was evaporated. Any remaining volatile material was removed under reduced pressure (0.01 mbar) to give lidocainium salicylate **2** as a colorless viscous liquid in 87% yield. IR (neat)  $\nu$  = 3196, 2982, 1684, 1628, 1582, 1483, 1458, 1379, 1252, 1139, 857, 760, 664 cm<sup>-1</sup>; <sup>1</sup>H-NMR (300 MHz, d<sub>6</sub>-DMSO)  $\delta$ (ppm) = 10.05 (br s, 1H), 7.72 (dd,  $J_1$  = 7.75 Hz,  $J_2$  = 1.80 Hz, 1H), 7.24 (m, 1H), 7.09 (s, 3H), 6.70 (m, 2H), 3.98 (s, 2H), 3.10 (q,  $J$  = 7.28 Hz, 4 H), 2.16 (s, 6H), 1.22 (t,  $J$  = 7.34 Hz, 6 H). <sup>13</sup>C-NMR (75 MHz, d<sub>6</sub>-DMSO)  $\delta$ (ppm) = 171.9, 164.6, 161.9, 135.0, 134.0, 133.4, 130.1, 127.8, 126.9, 117.6, 116.9, 116.4, 53.3, 48.3, 18.1, 9.5. HRMS (ES+) [ $m/z$ ] = 235.1814; (ES-) [ $m/z$ ] = 137.0265. T<sub>g</sub> 19.78 °C; T<sub>5%onset</sub> 158.46 °C.

**3. Table S1: Physical properties of tetrabutylphosphonium salicylate-salicylic acid salts.**

| Entry | Compound                                               | $\chi_{\text{acid}}$ | $T_g^a$<br>[°C] | $T_m^a$<br>[°C] | $T_{\text{onset}5\%}^b$<br>[°C] | $\eta^{c,d}$<br>[mPas] | $\sigma^{e,d}$<br>[μS/cm] |
|-------|--------------------------------------------------------|----------------------|-----------------|-----------------|---------------------------------|------------------------|---------------------------|
| 1     | P(Bu) <sub>4</sub> Sal                                 | 0                    | -56.5           | 57.3            | 307.9                           | 72.6                   | 336.0                     |
| 2     | P(Bu) <sub>4</sub> Sal <sub>1.5</sub> H <sub>0.5</sub> | 0.3                  | -51.7           | -               | 238.7                           | 169.5                  | 265.0                     |
| 3     | P(Bu) <sub>4</sub> Sal <sub>2</sub> H                  | 0.5                  | -45.6           | -               | 230.2                           | 187.0                  | 209.0                     |
| 4     | P(Bu) <sub>4</sub> Sal <sub>2.5</sub> H <sub>1.5</sub> | 0.6                  | -45.0           | -               | 224.4                           | 187.4                  | 159.7                     |
| 5     | P(Bu) <sub>4</sub> Sal <sub>3</sub> H <sub>2</sub>     | 0.75                 | -43.3           | -               | 212.5                           | 189.6                  | 155.3                     |
| 6     | Salicylic acid                                         | 1                    | -               | 158.1           | 162.0                           | -                      | -                         |

<sup>a</sup>Determined on a Mettler Toledo Star<sup>c</sup> DSC by heating to 110 °C at 5 °C/min and cooling at 5 °C/min to -80 °C for 3 cycles.

<sup>b</sup>Determined on a Mettler Toledo Star<sup>c</sup> TGA/DSC by heating from 25 °C to 600 °C at 5 °C/min under nitrogen. <sup>c</sup>Measured on a Brookfield CAP Viscometer at 50 °C. <sup>d</sup>Water content of all samples < 150 ppm according to Karl-Fisher titration. <sup>e</sup>Measured on a Mettler Toledo Conductivity meter S30 at 50 °C.

4. Figure S1: Liquifaction of solid PBu<sub>4</sub>Sal [1] with excess salicylic acid.

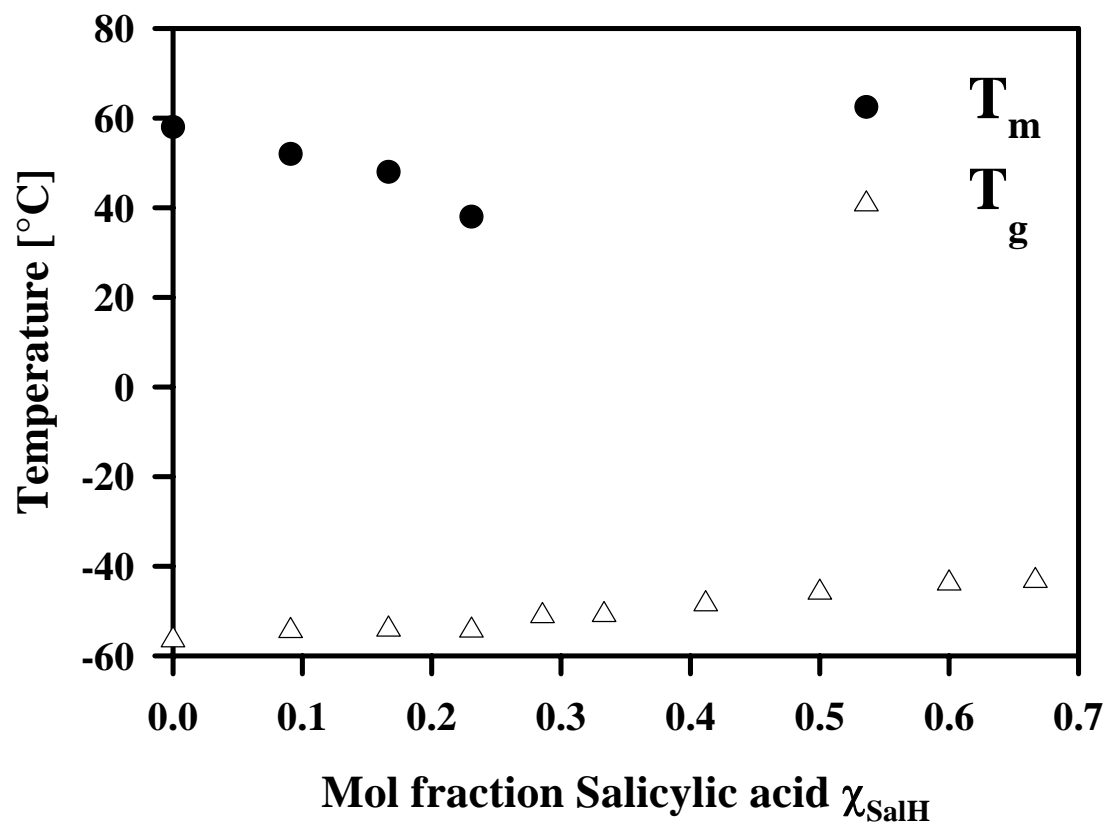

5. Figure S2: TGA traces of tetrabutylphosphonium salicylate-salicylic acid salts.

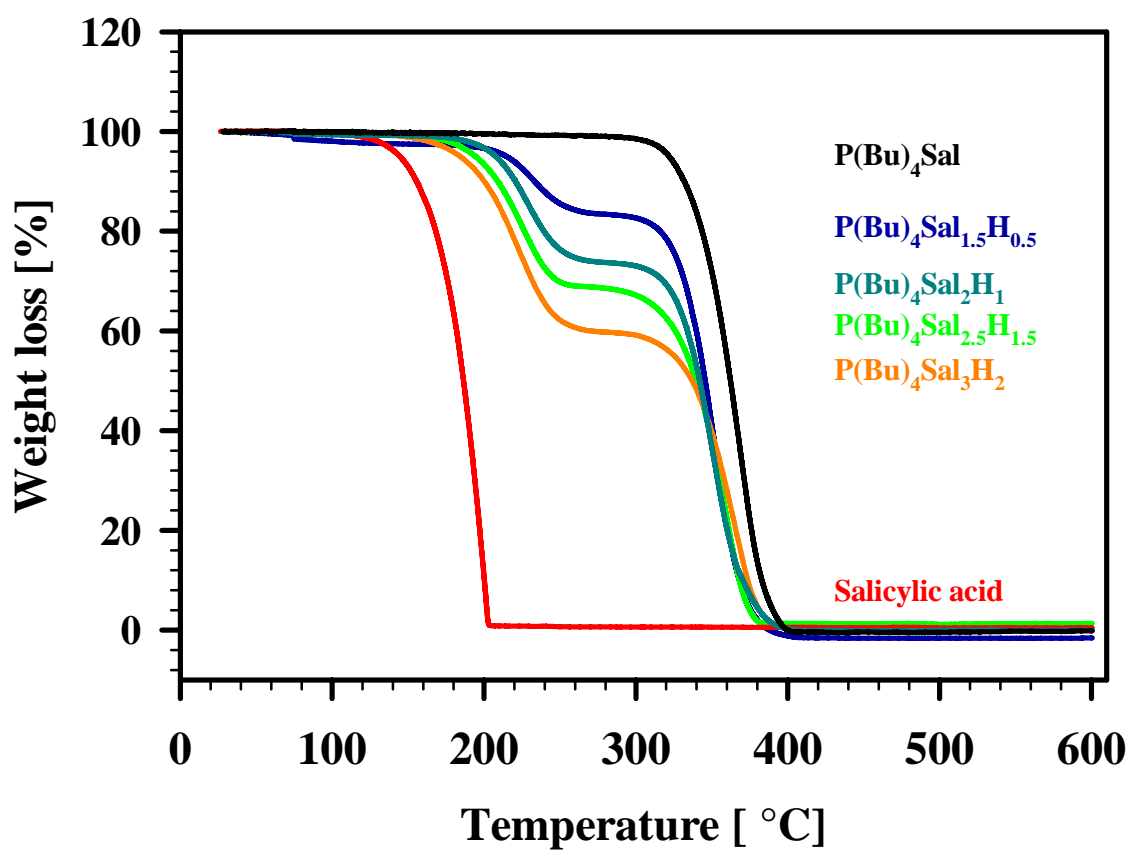

Supplement: b925147b.pdf [file b925147b.pdf]
